# Supplementary material for: Significant improvement in survival outcomes of trisomy 18 with neonatal intensive care compared to non-intensive care: a single-center study
Source: PeerJ. 2023 Nov 29;11:e16537. doi: 10.7717/peerj.16537 (PMC10693230; doi:10.7717/peerj.16537)
Supplement: Supplemental Information 1 [file peerj-11-16537-s001.xlsx]

## Sheet: Sheet1
Infant ID	female gender	GA (week)	BW (g)	Apgar 1min/5min	pre diagnosed	Caesarian section	operation	cardiac anomaly	esophageal atresia	policy	alive at discharge	survival period
1	1	41.4	2264	10/10	0	0	cardiac	1	0	intensive	1	3 years<
2	1	41.3	1474	4/9	1	0	0	1	0	restrictive	0	64 days
3	1	36.2	1822	5/6	1	1	GI	1	1	intensive	0	5 months
4	0	30.3	1050	3/6	0	1	0	1	0	intensive	0	12 months
5	1	41.1	2240		0	0	cardiac	1	0	intensive	1	3 years<
6	1	37.5	1722	4/5	1	0	0	1	0	Palliative	0	2 days
7	1	37.3	1732	2/4	1	0	0	1	1	restrictive	0	25 days
8	1	37.5	1490	3/6	1	1	GI	1	1	intensive	0	3 months
9	0	37.6	1976	1/1	1	0	0	1	0	Palliative	0	5 hours
10	1	37.6	1884	1/6	0	0	0	1	0	Palliative	0	4 days
11	1	37.5	1806	5/8	0	1	cardiac	1	0	intensive	1	3 years<
12	1	36.1	1917	4/6	0	1	0	1	0	intensive	1	3 years<
13	0	41.2	1664	4/9	1	0	0	1	0	intensive	0	5 months
14	0	40.2	1992	4/8	1	1	cardiac	1	0	intensive	0	7 monts
15	1	37.3	1470	8/8	0	0	GI	1	1	intensive	1	6 months
16	1	37.5	1644	3/9	0	1	0	1	0	intensive	1	9 months
17	0	36.6	1902	4/7	0	1	cardiac	1	0	intensive	0	7 months
18	1	39.3	2052	6/8	1	0	0	1	0	Palliative	0	6 days
